# Supplementary material
Source: HighWire-hosted journal article supplement (https://diabetes.diabetesjournals.org/content/suppl/2005/04/27/54.5.1607)
Supplement: OnlineAppendixPg1607.pdf [file OnlineAppendixPg1607.pdf]

Table appendix I. Haplotype association with plasma adiponectin levels in diabetic men without CVD

| Haplotypes |       |       |     |      | Frequency | Mean difference, $\mu\text{g/mL}$ |       |           |       |
|------------|-------|-------|-----|------|-----------|-----------------------------------|-------|-----------|-------|
| -11365     | -4034 | -3964 | +45 | +276 |           | Unadjusted                        | P     | Adjusted* | P     |
| C          | A     | A     | T   | G    | 0.20      | Reference                         |       | Reference |       |
| C          | A     | A     | T   | T    | 0.18      | 3.3                               | 0.006 | 3.2       | 0.016 |
| G          | A     | A     | T   | G    | 0.15      | 2.1                               | 0.06  | 1.6       | 0.16  |
| C          | C     | G     | T   | G    | 0.11      | 2.1                               | 0.09  | 2.0       | 0.11  |
| C          | A     | A     | G   | G    | 0.10      | -0.4                              | 0.39  | -0.8      | 0.53  |
| C          | C     | A     | T   | T    | 0.08      | 7.4                               | 0.009 | 7.1       | 0.02  |
| G          | C     | G     | T   | G    | 0.05      | -2.5                              | 0.91  | -1.7      | 0.91  |

\*: adjusting for age, BMI, smoking, alcohol consumption, physical activity, HbA1c, aspirin use, history of hypertension and history of hypercholesterolemia.

Table appendix II. Haplotype association with CVD risk in diabetic men

| Haplotypes |       |       |     |      | Frequency |          | OR (95% CI)      | P    |
|------------|-------|-------|-----|------|-----------|----------|------------------|------|
| -11365     | -4034 | -3964 | +45 | +276 | Cases     | Controls |                  |      |
| C          | A     | A     | T   | G    | 0.22      | 0.20     | 1.0              |      |
| C          | A     | A     | T   | T    | 0.19      | 0.18     | 1.09 (0.75-1.59) | 0.65 |
| G          | A     | A     | T   | G    | 0.13      | 0.14     | 0.91 (0.58-1.41) | 0.67 |
| C          | C     | G     | T   | G    | 0.15      | 0.11     | 1.30 (0.87-1.94) | 0.20 |
| C          | A     | A     | G   | G    | 0.10      | 0.10     | 1.02 (0.65-1.58) | 0.93 |
| C          | C     | A     | T   | T    | 0.08      | 0.08     | 0.97 (0.56-1.69) | 0.92 |
| G          | C     | G     | T   | G    | 0.04      | 0.05     | 0.86 (0.47-1.60) | 0.64 |

Abbreviations: CVD, cardiovascular diseases; OR, odds ratio.
